# Supplementary material
Source: PubMed Central journal article supplement (PMC10184477)
Supplement: NIHMS1883969-supplement-MMC1.pdf [file NIHMS1883969-supplement-MMC1.pdf]

## **SUPPLEMENTARY INFORMATION**

# **Medial Frontal Cortex GABA Concentrations in Psychosis Spectrum and Mood Disorders: A Meta-Analysis of Proton Magnetic Resonance Spectroscopy Studies**

Simmonite *et al.*

## **Voxel Classification**

To classify the voxels from each publication, we first created a blank brain template onto which all voxels were to be placed. This template consisted of the outline of a mid-sagittal view of the brain and included the corpus callosum and anterior commissure as reference points. For each study, all information about voxel placement was extracted from the article. For publications that included a figure demonstrating placement, we digitally traced the voxel, corpus callosum, anterior commissure and outline of the brain, and used these landmarks to resize and place the voxel onto our template. If articles did not include a reference image, we reviewed the literature for other publications of the same dataset for such an image. If this was not available, we reviewed in-text information regarding voxel placement, and placed a voxel onto our template as best we could. We were able to find sufficient information to place voxels on the template image for all studies which met our inclusion criteria. Following placement of all voxels onto the template, we examined each to ensure that it was the correct size relative to others and adjusted where necessary. Since the figures featured voxels that were rendered on to brains of slightly different shapes/sizes, we wanted to ensure that on our template brain, a voxel that measured  $3 \times 3 \times 3 \text{ cm}^3$  for example, was proportional to one measuring  $4 \times 4 \times 4 \text{ cm}^3$ .

We made preliminary assignments based on how voxels cluster, guided by the  $k = 3$  cluster solution presented in de la Vega et al., (2016). Our rostral MFC subregion included the ventromedial prefrontal cortex and pregenual anterior cingulate cortex. The mid MFC subregion included the anterior ventral midcingulate cortex and dorsomedial prefrontal cortex. Finally, our posterior MFC subregion was comprised of the posterior ventral midcingulate cortex, posterior dorsal midcingulate cortex, and anterior dorsal midcingulate cortex.

Following initial classification, assignments were reviewed to ensure that at least two-thirds of the voxel was contained within the sub-region. Since a cluster of voxels straddled the rostral- and mid-regions of the MFC – i.e., encompassing the dorsomedial prefrontal cortex and pregenual anterior cingulate cortex - and were not easily classified into either sub-region, we created a separate rostral-mid subregion and analysed them separately. We placed voxels from all eligible studies on to the template and classified them together, ensuring there were no differences in classifications between diagnoses. Co-registration of the voxels on to the template was performed by one author (C.J.S.) and reviewed by the others (M.S. and S.F.T.) Decisions regarding the classification of the voxels were performed by all authors in consensus.

## **Supplementary Results**

To compare with our subregional meta-analyses, we also performed meta-analyses in which we included all voxels from across our four MFC subregions. Forest plots describing these meta-analyses are provided in Supplemental Figures 1- 4.

### ***Schizophrenia***

Meta-analysis including voxels from all subregions of the MFC revealed no significant GABA concentration differences in the full schizophrenia sample (SMD = -0.14, 95% CI = -0.32 to 0.05,  $p = 0.14$ ) or acute subsample (SMD = -0.01, 95% CO = -0.33 to 0.32,  $p = .97$ ), relative to healthy controls. GABA concentrations were significantly reduced in chronic patients (SMD = -0.26, 95% CI = -0.44 to -0.07,  $p = 0.007$ ).

### ***Depression***

When combining across all subregions of the MFC, GABA concentrations were reduced in the full depression sample (SMD = -0.26, 95% CI = -0.48 to -0.04,  $p = 0.02$ ), and the currently depressed subgroup (SMD = -0.30, 95% CI = -0.55 to -0.05,  $p = 0.02$ ). There were no significant differences between the remitted subgroup and healthy controls (SMD = -0.01, 95% CI = -0.40 to -0.04,  $p = 0.95$ ).

### ***Bipolar Disorder***

Meta-analysis revealed elevated GABA concentrations in patients with bipolar disorder relative to controls (SMD = 0.38, 95% CI = 0.11 to 0.65,  $p = .0064$ ).

### ***UHR***

Combining across all regions of the MFC revealed no significant GABA differences between UHR individuals and healthy controls (SMD = -0.52, 95% CI = -1.58 to 0.54,  $p = 0.33$ ).

| Supplementary Table 1: Characteristics of included Schizophrenia studies                                                                                                                                                                                                                                                                                                                                                                                                                                                                                                                                                                     |      |               |         |               |                |                      |                    |                  |               |                |                      |                   |
|----------------------------------------------------------------------------------------------------------------------------------------------------------------------------------------------------------------------------------------------------------------------------------------------------------------------------------------------------------------------------------------------------------------------------------------------------------------------------------------------------------------------------------------------------------------------------------------------------------------------------------------------|------|---------------|---------|---------------|----------------|----------------------|--------------------|------------------|---------------|----------------|----------------------|-------------------|
| Study                                                                                                                                                                                                                                                                                                                                                                                                                                                                                                                                                                                                                                        | Case |               | Control |               | Gender (%male) | Currently Medicate d | Diagnosis          | Illness duration | MRS technique | Field Strength | Reference Metabolite | Analysis software |
|                                                                                                                                                                                                                                                                                                                                                                                                                                                                                                                                                                                                                                              | n    | Mean age ± SD | n       | Mean age ± SD |                |                      |                    |                  |               |                |                      |                   |
| <b>Rostral MFC</b>                                                                                                                                                                                                                                                                                                                                                                                                                                                                                                                                                                                                                           |      |               |         |               |                |                      |                    |                  |               |                |                      |                   |
| Cen et al., 2020 (1)                                                                                                                                                                                                                                                                                                                                                                                                                                                                                                                                                                                                                         | 23   | 27.0 ± 6.5    | 26      | 25.9 ± 4.6    | 39.1           | Unmed                | 10 FES, 10 SPF     | Acute            | MEGA-PRESS    | 3              | Water                | LCModel           |
| Chen et al., 2017 (2)                                                                                                                                                                                                                                                                                                                                                                                                                                                                                                                                                                                                                        | 24   | 28.8 ± 8.3    | 24      | 26.6 ± 4.7    | 41.7           | Unmed                | 24 SZ              | Acute            | MEGA-PRESS    | 3              | Water                | LCModel           |
| Chiu et al., 2018 (3)                                                                                                                                                                                                                                                                                                                                                                                                                                                                                                                                                                                                                        | 19   | 29.1 ± 6.7    | 14      | 27.7 ± 5.9    | 57.4           | Med                  | 19 FES             | Acute            | MEGA-PRESS    | 3              | Water                | Gannet 2.0        |
| De la Fuente-Sandoval et al., 2018 (4)                                                                                                                                                                                                                                                                                                                                                                                                                                                                                                                                                                                                       | 28   | 23.0 ± 6.1    | 18      | 23.0 ± 3.8    | 71.4           | Unmed                | 28 FEP             | Acute            | J-editing     | 3              | Water                | Inhouse software  |
| Kegeles et al., 2012 (medicated) (5)                                                                                                                                                                                                                                                                                                                                                                                                                                                                                                                                                                                                         | 16   | 32.0 ± 10.0   | 11      | 33.0 ± 8.0    | 68.8           | Med                  | 12 SZ, 4 SAD       | Chronic          | J-editing     | 3              | Water                | Inhouse software  |
| Kegeles et al., 2012 (unmedicated) (5)                                                                                                                                                                                                                                                                                                                                                                                                                                                                                                                                                                                                       | 16   | 32.0 ± 11.0   | 11      | 33.0 ± 8.0    | 68.8           | Unmed                | 10 SZ, 6 SAD       | Chronic          | J-editing     | 3              | Water                | Inhouse software  |
| Ragland et al., 2020 (medicated) (6)                                                                                                                                                                                                                                                                                                                                                                                                                                                                                                                                                                                                         | 29   | 23.5 ± 4.6    | 25      | 24.2 ± 4.7    | 70.0           | Med                  | 29 SZ              | Acute            | MEGA-PRESS    | 3              | Cr                   | jMRUI 4.0         |
| Ragland et al., 2020 (unmedicated) (6)                                                                                                                                                                                                                                                                                                                                                                                                                                                                                                                                                                                                       | 9    | 23.5 ± 4.6    | 24      | 24.2 ± 4.7    | 70.0           | Unmed                | 9 SZ               | Acute            | MEGA-PRESS    | 3              | Cr                   | jMRUI 4.0         |
| Simmonite et al., 2022 (7)                                                                                                                                                                                                                                                                                                                                                                                                                                                                                                                                                                                                                   | 14   | 21.6 ± 2.6    | 15      | 21.6 ± 3.6    | 64.3           | Mixed                | 14 FEP             | Acute            | MEGA-PRESS    | 3              | Water                | Gannet 3.0        |
| Wang et al., 2016 (8)                                                                                                                                                                                                                                                                                                                                                                                                                                                                                                                                                                                                                        | 16   | 22.1 ± 5.5    | 23      | 22.5 ± 5.5    | 50.0           | Unmed                | SZ, SPF            | Acute            | MEGA-PRESS    | 3              | Water                | LCModel           |
| Xia et al., 2018 (drug group baseline) (9)                                                                                                                                                                                                                                                                                                                                                                                                                                                                                                                                                                                                   | 17   | 31.0 ± 7.7    | 10      | 30.9 ± 5.3    | 47.0           | Med                  | 17 SZ              | Chronic          | MEGA-PRESS    | 3              | Cr                   | Gannet 2.0        |
| Xia et al., 2018 (ECT group baseline) (9)                                                                                                                                                                                                                                                                                                                                                                                                                                                                                                                                                                                                    | 14   | 27.6 ± 7.3    | 9       | 30.9 ± 5.3    | 50.0           | Med                  | 14 SZ              | Chronic          | MEGA-PRESS    | 3              | Cr                   | Gannet 2.0        |
| Yang et al., 2015 (10)                                                                                                                                                                                                                                                                                                                                                                                                                                                                                                                                                                                                                       | 22   | 26.1 ± 5.8    | 23      | 25.5 ± 4.4    | 40.9           | Unmed                | 10 SZ, 12 SPF      | Acute            | MEGA-PRESS    | 3              | Water                | LCModel           |
| <b>Rostral-Mid MFC</b>                                                                                                                                                                                                                                                                                                                                                                                                                                                                                                                                                                                                                       |      |               |         |               |                |                      |                    |                  |               |                |                      |                   |
| Marsman et al., 2014 (11)                                                                                                                                                                                                                                                                                                                                                                                                                                                                                                                                                                                                                    | 13   | 27.6 ± 6.1    | 19      | 27.7 ± 5.3    | 76.5           | Med                  | 13 SZ              | Chronic          | MEGA-sLASER   | 7              | Cr                   | Inhouse software  |
| Rowland et al., 2013 (older) (12)                                                                                                                                                                                                                                                                                                                                                                                                                                                                                                                                                                                                            | 10   | 51.1 ± 4.0    | 10      | 49.4 ± 3.9    | 70.0           | Med                  | 10 SZ              | Chronic          | MEGA-PRESS    | 3              | Water                | csx3              |
| Rowland et al., 2013 (young) (12)                                                                                                                                                                                                                                                                                                                                                                                                                                                                                                                                                                                                            | 11   | 30.2 ± 6.6    | 19      | 33.4 ± 6.5    | 81.8           | Med                  | 11 SZ              | Chronic          | MEGA-PRESS    | 3              | water                | csx3              |
| <b>Mid MFC</b>                                                                                                                                                                                                                                                                                                                                                                                                                                                                                                                                                                                                                               |      |               |         |               |                |                      |                    |                  |               |                |                      |                   |
| Bojesen et al., 2021 (13)                                                                                                                                                                                                                                                                                                                                                                                                                                                                                                                                                                                                                    | 37   | 22.7 ± 5.0    | 47      | 22.2 ± 4.1    | 42.9           | Unmed                | SZ, SAD, NOP, PP   | Acute            | MEGA-PRESS    | 3              | Water                | Gannet            |
| Brandt et al., 2016 (14)                                                                                                                                                                                                                                                                                                                                                                                                                                                                                                                                                                                                                     | 24   | 37.5 ± 26.7   | 24      | 36.6 ± 14.5   | 79.2           | Med                  | SZ, SAD            | Chronic          | STEAM         | 7              | Water                | LCModel           |
| Goto et al., 2009 (15)                                                                                                                                                                                                                                                                                                                                                                                                                                                                                                                                                                                                                       | 18   | 29.0 ± 11.0   | 18      | 30.0 ± 11.0   | 50.0           | Med                  | 18 SZ              | Acute            | MEGA-PRESS    | 3              | Cr                   | LCModel           |
| Ongur et al., 2010 (16)                                                                                                                                                                                                                                                                                                                                                                                                                                                                                                                                                                                                                      | 21   | 39.0 ± 10.8   | 19      | 36.3 ± 9.8    | 66.7           | Med                  | 21 SZ              | Chronic          | MEGA-PRESS    | 4              | Cr                   | LCModel           |
| Reid et al., 2019 (17)                                                                                                                                                                                                                                                                                                                                                                                                                                                                                                                                                                                                                       | 21   | 23.3 ± 4.4    | 21      | 23.5 ± 4.4    | 76.2           | Med                  | SZ, SAD            | Acute            | STEAM         | 7              | Water                | LCModel           |
| Rowland et al., 2016 (older) (18)                                                                                                                                                                                                                                                                                                                                                                                                                                                                                                                                                                                                            | 31   | 48.3 ± 5.8    | 37      | 52.0 ± 6.0    | 61.3           | Mixed                | 50 SZ, 10 SAD      | Chronic          | MEGA-PRESS    | 3              | Water                | Gannet 2.0        |
| Rowland et al., 2016 (young) (18)                                                                                                                                                                                                                                                                                                                                                                                                                                                                                                                                                                                                            | 29   | 25.7 ± 4.3    | 40      | 25.3 ± 4.6    | 69.0           | Mixed                |                    | Chronic          | MEGA-PRESS    | 3              | Water                | Gannet 2.0        |
| Wang et al., 2019 (19)                                                                                                                                                                                                                                                                                                                                                                                                                                                                                                                                                                                                                       | 81   | 22.3 ± 4.4    | 91      | 25.3 ± 3.9    | 70.4           | Med                  | 81 FEP             | Acute            | STEAM         | 7              | Water                | LCModel           |
| Wijtenburg et al., 2021 (acute) (20)                                                                                                                                                                                                                                                                                                                                                                                                                                                                                                                                                                                                         | 18   | 24.3 ± 3.9    | 19      | NR            | 68.4           | Med                  | 18 SZ              | Acute            | STEAM         | 7              | Water                | LCModel           |
| Wijtenburg et al., 2021 (chronic) (20)                                                                                                                                                                                                                                                                                                                                                                                                                                                                                                                                                                                                       | 21   | 43.1 ± 11.0   | 17      | NR            | 47.6           | Med                  | 18 SZ              | Chronic          | STEAM         | 7              | Water                | LCModel           |
| <b>Posterior MFC</b>                                                                                                                                                                                                                                                                                                                                                                                                                                                                                                                                                                                                                         |      |               |         |               |                |                      |                    |                  |               |                |                      |                   |
| Hjelmervik et al., 2020 (21)                                                                                                                                                                                                                                                                                                                                                                                                                                                                                                                                                                                                                 | 37   | 29.8 ± 11.5   | 38      | 30.2 ± 10.2   | NR             | Mixed                | 37 SSD             | Chronic          | MEGA-PRESS    | 3              | Water                | LCModel           |
| Marengo et al., 2016 (medicated) (22)                                                                                                                                                                                                                                                                                                                                                                                                                                                                                                                                                                                                        | 70   | 31.2 ± 9.2    | 92      | 30.6 ± 9.2    | 71.4           | Med                  | 56 SZ, 8 SAD, 6 OP | Chronic          | J-editing     | 3              | Cr                   | Inhouse software  |
| Marengo et al., 2016 (unmedicated) (22)                                                                                                                                                                                                                                                                                                                                                                                                                                                                                                                                                                                                      | 25   | 28.4 ± 8.7    | 92      | 30.6 ± 9.2    | 72.0           | Unmed                | 16 SZ, 3 SAD, 6 OP | Chronic          | J-editing     | 3              | Cr                   | Inhouse software  |
| Tayoshi et al., 2010 (23)                                                                                                                                                                                                                                                                                                                                                                                                                                                                                                                                                                                                                    | 38   | 34.0 ± 10.0   | 29      | 34.0 ± 10.2   | 52.6           | Med                  | 38 SZ              | Chronic          | MEGA-PRESS    | 3              | Water                | LCModel           |
| Abbreviations: Cr, creatine; ECT, electroconvulsive therapy; FEP, first episode psychosis; Med, medicated; MEGA-PRESS, Mescher-Garwood point resolved spectroscopy; MEGA-sLASER, Mescher-Garwood-semi-localized by adiabatic selective refocusing; MFC, medial frontal cortex; NOP, non-organic psychosis; OP, psychosis not otherwise specified; PP, paranoid psychosis; PRESS, point resolved spectroscopy; SAD, schizoaffective disorder; SD, standard deviation; SSD, schizophrenia spectrum disorder; SFP, schizophreniform disorder; STEAM, stimulated echo acquisition mode; SZ, schizophrenia; NR, not reported; Unmed, unmedicated. |      |               |         |               |                |                      |                    |                  |               |                |                      |                   |

| Supplementary Table 2: Characteristics of included Depression studies |      |               |         |               |                |                     |                 |                |                      |                   |
|-----------------------------------------------------------------------|------|---------------|---------|---------------|----------------|---------------------|-----------------|----------------|----------------------|-------------------|
| Study                                                                 | Case |               | Control |               | Gender (%male) | Currently Medicated | MRS technique   | Field Strength | Reference Metabolite | Analysis software |
|                                                                       | n    | Mean age ± SD | n       | Mean age ± SD |                |                     |                 |                |                      |                   |
| <b>Rostral MFC</b>                                                    |      |               |         |               |                |                     |                 |                |                      |                   |
| Brennan et al., 2017 (24)                                             | 17   | 38.5 ± 12.2   | 9       | 38.4 ± 14.1   | 57.9           | Unmedicated         | MEGA-PRESS      | 3              | Cr                   | LCModel           |
| Gabbay et al., 2012 (anhedonic) (25)                                  | 10   | 18 ± 1.9      | 10      | 16.2 ± 1.6    | 40.0           | Mixed               | J-editing       | 3              | Water                | Inhouse software  |
| Gabbay et al., 2012 (non-anhedonic) (25)                              | 10   | 15.3 ± 2.7    | 11      | 16.2 ± 1.6    | 40.0           | Mixed               | J-editing       | 3              | Water                | Inhouse software  |
| Gabbay et al., 2017 (26)                                              | 24   | 16.1 ± 2.6    | 15      | 15.3 ± 2.7    | 54.2           | Unmedicated         | J-editing       | 3              | Water                | Inhouse software  |
| Hasler et al., 2005 (27)                                              | 16   | 41 ± 11.6     | 15      | 41.7 ± 12.4   | 33.3           | Unmedicated         | J-editing       | 3              | Water                | MRUI              |
| Hasler et al., 2007 (28)                                              | 20   | 34 ± 11.2     | 20      | 34.8 ± 12.4   | 35.0           | Unmedicated         | J-editing       | 3              | Water                | Inhouse software  |
| Ironside et al., 2021 (depressed) (29)                                | 17   | 21.1 ± 1.8    | 7       | 21.5 ± 2.5    | 0.0            | Unmedicated         | MEGA-PRESS      | 3              | Water                | LCModel           |
| Ironside et al., 2021 (remitted) (29)                                 | 13   | 21.1 ± 2.12   | 6       | 21.5 ± 2.5    | 0.0            | Unmedicated         | MEGA-PRESS      | 3              | Water                | LCModel           |
| Kantrowitz et al., 2021 (female) (30)                                 | 12   | 35 ± 10.4     | 19      | 36.9 ± 9.7    | 0.0            | Unmedicated         | PROBE-P/PROBE-J | 3              | NAA                  | Gannet            |
| Kantrowitz et al., 2021 (male) (30)                                   | 22   | 38.4 ± 11     | 13      | 30.7 ± 5.1    | 100.0          | Unmedicated         | PROBE-P/PROBE-J | 3              | NAA                  | Gannet            |
| Price et al., 2009 (treatment resistant) (31)                         | 12   | 46.8 ± 11.8   | 10      | 37.3 ± 13.5   | 56.3           | Unmedicated         | J-editing       | 3              | Water                | Inhouse software  |
| Price et al., 2009 (treatment responsive) (31)                        | 16   | 38.3 ± 12.3   | 11      | 37.3 ± 13.5   | 66.7           | Unmedicated         | J-editing       | 3              | Water                | Inhouse software  |
| Walter et al., 2010 (anhedonic) (32)                                  | 4    | 40 ± NR       | 6       | 34.6 ± NR     | 42.1           | Unmedicated         | J-PRESS         | 3              | Cr                   | ProFit            |
| Walter et al., 2010 (non-anhedonic) (32)                              | 5    | 40 ± NR       | 7       | 34.6 ± NR     | 42.1           | Unmedicated         | J-PRESS         | 3              | Cr                   | ProFit            |
| Wang et al., 2019 (33)                                                | 19   | 47.7 ± 1.9    | 71      | 46.8 ± 2.0    | 0.0            | NR                  | MEGA-PRESS      | 3              | Water                | TARQUIN           |
| Zhang et al., 2016 (34)                                               | 11   | 34.1 ± 8.8    | 11      | 33.6 ± 7.2    | 0.0            | Mixed               | MEGA-PRESS      | 3              | Water                | LCModel           |
| <b>Rostral-Mid MFC</b>                                                |      |               |         |               |                |                     |                 |                |                      |                   |
| Deligiannidis et al., 2019 (35)                                       | 25   | 28.6 ± 4.9    | 28      | 29.0 ± 5.0    | 0              | Unmedicated         | MEGA-PRESS      | 3              | Cr                   | Gannet            |
| Draganov et al., 2020 (36)                                            | 23   | 37.3 ± 10.8   | 54      | 41.8 ± 10.1   | 41.9           | Unmedicated         | PRESS           | 3              | Water                | TARQUIN           |
| Hasler et al., 2005 (27)                                              | 16   | 41.0 ± 11.6   | 15      | 41.7 ± 12.4   | 33.3           | Unmedicated         | J-editing       | 3              | Water                | MRUI              |
| Hasler et al., 2007 (28)                                              | 20   | 34.0 ± 11.2   | 20      | 34.8 ± 12.4   | 35.0           | Unmedicated         | J-editing       | 3              | Water                | Inhouse software  |
| Knudsen et al., 2019 (37)                                             | 10   | 38.4 ± 10.9   | 10      | 38.8 ± 10.8   | 40.0           | Medicated           | SPECIAL         | 3              | Cr                   | LCModel           |
| <b>Mid MFC</b>                                                        |      |               |         |               |                |                     |                 |                |                      |                   |
| Baeken et al., 2017 (38)                                              | 18   | 47.2 ± 12.5   | 18      | 45.8 ± 12.3   | 33.3           | Mixed               | PRESS           | 3              | Water                | jMRUI 5.1         |
| Benson et al., 2020 (39)                                              | 41   | 33.2 ± 14.4   | 20      | 33.9 ± 14.6   | 19.5           | Unmedicated         | MEGA-PRESS      | 4              | Cr                   | LCModel           |
| Bhagwagar et al., 2008 (40)                                           | 12   | 40.6 ± 4.2    | 11      | 34.3 ± 4.1    | 33.3           | Unmedicated         | MEGA-PRESS      | 3              | Cr                   | LCModel           |
| Persson et al., 2021 (41)                                             | 42   | 29.2 ± 9.4    | 45      | 29.5 ± 11.2   | 50.0           | Mixed               | MEGA-PRESS      | 3              | Cr                   | Gannet 3.0        |
| Smith et al., 2021 (42)                                               | 9    | 70.0 ± 7.0    | 9       | 67.0 ± 7.0    | 44.4           | Medicated           | STEAM           | 7              | Cr                   | LCModel           |
| Wang et al., 2016 (43)                                                | 19   | 53.9 ± 2.6    | 13      | 52.6 ± 2.18   | 0              | Unmedicated         | MEGA-PRESS      | 3              | Water                | Gannet            |

Abbreviations: Cr, creatine; MEGA-PRESS, Mescher-Garwood point resolved spectroscopy; MFC, medial frontal cortex; PRESS, point resolved spectroscopy; SD, standard deviation; SPECIAL, spin echo full intensity-acquired localized spectroscopy; STEAM, stimulated echo acquisition mode; NAA, N-acetyl aspartate; NR, not reported.

| Supplementary Table 3: Characteristics of included bipolar disorder studies                                                                                                                                                                                        |      |               |         |               |                |                     |               |                |                      |                   |
|--------------------------------------------------------------------------------------------------------------------------------------------------------------------------------------------------------------------------------------------------------------------|------|---------------|---------|---------------|----------------|---------------------|---------------|----------------|----------------------|-------------------|
| Study                                                                                                                                                                                                                                                              | Case |               | Control |               | Gender (%male) | Currently Medicated | MRS technique | Field Strength | Reference Metabolite | Analysis software |
|                                                                                                                                                                                                                                                                    | n    | Mean age ± SD | n       | Mean age ± SD |                |                     |               |                |                      |                   |
| <b>Rostral MFC</b>                                                                                                                                                                                                                                                 |      |               |         |               |                |                     |               |                |                      |                   |
| Brady et al., 2013 (medicated) (44)                                                                                                                                                                                                                                | 10   | 32.6 ± 13.6   | 7       | 36.9 ± 10.4   | 57.1           | Medicated           | MEGA-PRESS    | 4              | Cr                   | LCModel           |
| Brady et al., 2013 (unmedicated) (44)                                                                                                                                                                                                                              | 4    | 32.6 ± 13.6   | 7       | 36.9 ± 10.4   | 57.1           | Unmedicated         | MEGA-PRESS    | 4              | Cr                   | LCModel           |
| Godlewska et al., 2014 (45)                                                                                                                                                                                                                                        | 13   | 23.8 ± 3.6    | 11      | 21.9 ± 2.7    | 46.2           | Unmedicated         | SPECIAL       | 3              | Cr                   | LCModel 6.2-2B    |
| Wang et al., 2006 (46)                                                                                                                                                                                                                                             | 15   | 35.7 ± 11.4   | 6       | 41.7 ± 21.2   | 80.0           | Mixed               | J-editing     | 3              | Cr                   | SAGE              |
| <b>Mid MFC</b>                                                                                                                                                                                                                                                     |      |               |         |               |                |                     |               |                |                      |                   |
| Huber et al., 2018 (47)                                                                                                                                                                                                                                            | 19   | 17.5 ± 2.6    | 10      | 19.0 ± 1.6    | 31.6           | NR                  | J-PRESS       | 3              | Water                | ProFit            |
| Priscandaro et al., 2017 (48)                                                                                                                                                                                                                                      | 18   | 36.3 ± 11.4   | 15      | 38.0 ± 11.1   | 55.0           | Mixed               | J-RES         | 3              | Water                | ProFit            |
| Soeiro-de-Souza et al., 2015 (49)                                                                                                                                                                                                                                  | 50   | 31.7 ± 9.1    | 38      | 25.7 ± 5.7    | 38.0           | Mixed               | J-PRESS       | 3              | Cr                   | ProFit            |
| Abbreviations: Cr, creatine; MEGA-PRESS, Meschler-Garwood point resolved spectroscopy; MFC, medial frontal cortex; PRESS, point resolved spectroscopy; SD, standard deviation; SPECIAL, spin echo full intensity-acquired localized spectroscopy; NR, not reported |      |               |         |               |                |                     |               |                |                      |                   |

| Supplementary Table 4: Characteristics of included Ultra High-Risk studies                                                                                                   |      |               |         |               |                |                     |               |                |                      |                   |
|------------------------------------------------------------------------------------------------------------------------------------------------------------------------------|------|---------------|---------|---------------|----------------|---------------------|---------------|----------------|----------------------|-------------------|
| Study                                                                                                                                                                        | Case |               | Control |               | Gender (%male) | Currently Medicated | MRS technique | Field Strength | Reference Metabolite | Analysis software |
|                                                                                                                                                                              | n    | Mean age ± SD | n       | Mean age ± SD |                |                     |               |                |                      |                   |
| <b>Rostral MFC</b>                                                                                                                                                           |      |               |         |               |                |                     |               |                |                      |                   |
| De la Fuente-Sandoval et al., 2015 (50)                                                                                                                                      | 23   | 20.7 ± 4.1    | 24      | 21.4 ± 3.3    | 65.22          | Unmedicated         | J-editing     | 3              | Water                | Inhouse software  |
| Menschikov et al., 2016 (51)                                                                                                                                                 | 21   | NR            | 26      | NR            | 100.0          | NR                  | MEGA-PRESS    | 3              | Cr                   | jMRUI 5.1a        |
| Simmonite et al., 2022 (7)                                                                                                                                                   | 7    | 19.9 ± 3.6    | 15      | 21.6 ± 21.6   | 71.43          | Mixed               | MEGA-PRESS    | 3              | Water                | Gannet 3.1        |
| Wang et al., 2016 (8)                                                                                                                                                        | 21   | 21.1 ± 5.7    | 23      | 22.5 ± 22.5   | 57.14          | Unmedicated         | MEGA-PRESS    | 3              | Water                | LCModel           |
| <b>Mid MFC</b>                                                                                                                                                               |      |               |         |               |                |                     |               |                |                      |                   |
| Wenneberg et al., 2020 (medicated) (52)                                                                                                                                      | 54   | 23.9 ± 4.2    | 26      | 25.3 ± 5.2    | N.R.           | Medicated           | MEGA-PRESS    | 3              | Water                | Gannet 3.0        |
| Wenneberg et al., 2020 (unmedicated) (52)                                                                                                                                    | 47   | 23.9 ± 4.2    | 27      | 25.3 ± 5.2    | N.R.           | Unmedicated         | MEGA-PRESS    | 3              | water                | Gannet 3.0        |
| <b>Posterior MFC</b>                                                                                                                                                         |      |               |         |               |                |                     |               |                |                      |                   |
| Da Silva et al., 2019 (53)                                                                                                                                                   | 35   | 20.6 ± 1.6    | 18      | 21.3 ± 2.0    | 54.3           | Mixed               | MEGA-PRESS    | 3              | Water                | Gannet            |
| Modinos et al., 2018 (54)                                                                                                                                                    | 21   | 22.2 ± 3      | 20      | 23.7 ± 2.7    | 100.0          | Unmedicated         | MEGA-PRESS    | 3              | Cr                   | LCModel6.3-1L     |
| Abbreviations: Cr, creatine; JRES, J-resolved; MEGA-PRESS, Mescher-Garwood point resolved spectroscopy; MFC, medial frontal cortex; SD, standard deviation; NR, not reported |      |               |         |               |                |                     |               |                |                      |                   |

## Medial Frontal Cortex in Schizophrenia

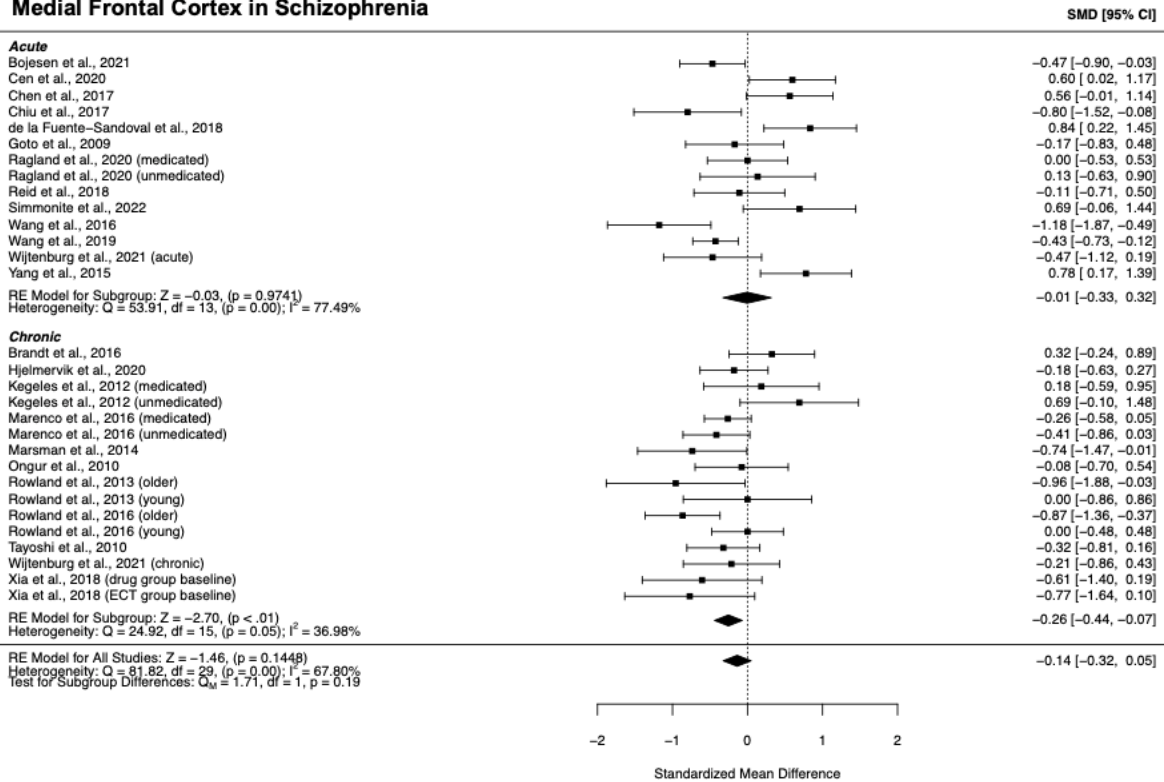

Supplementary Figure 1: Forest plots showing summary effect sizes between individuals with schizophrenia and healthy controls for all voxels within the MFC. Negative SMDs denote lower GABA concentrations in patients in comparison with controls and positive SMDs denote higher GABA concentrations in patients relative to controls. Abbreviations: SMD – standardized mean difference, CI – confidence interval, RE – Random effects, df – degrees of freedom.

## Medial Frontal Cortex in Depression

SMD [95% CI]

### Depressed

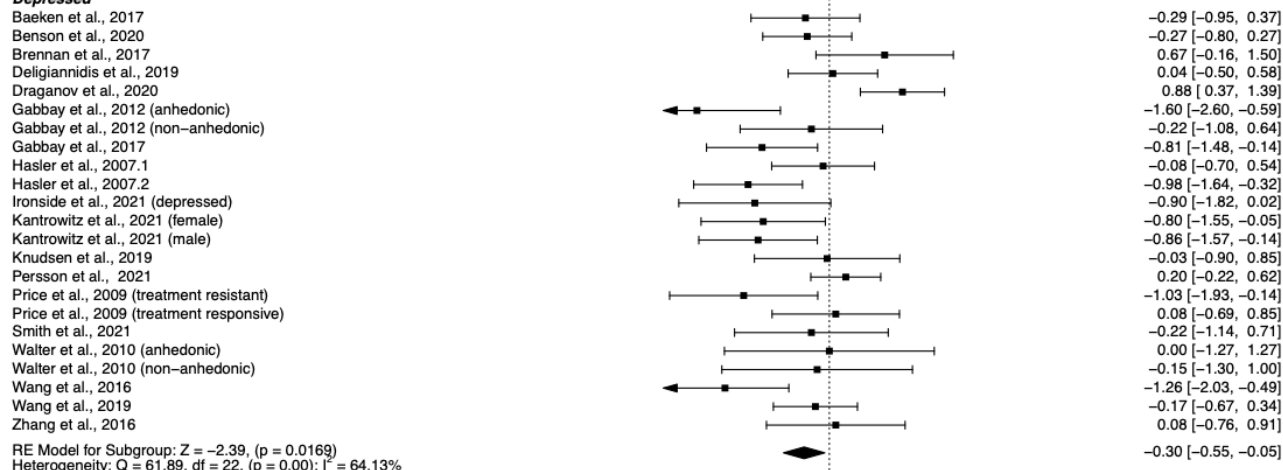

### Remitted

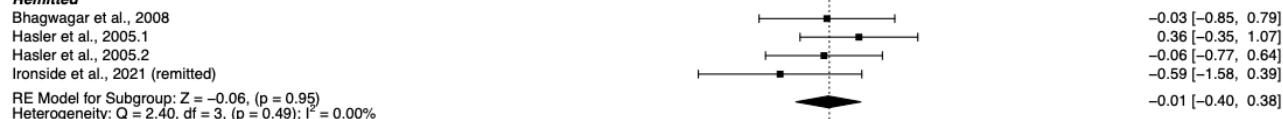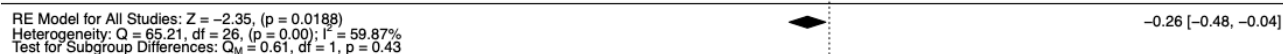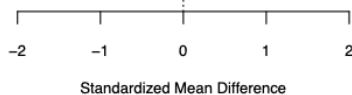

Supplementary Figure 2: Forest plots showing summary effect sizes between individuals with depression and healthy controls for all voxels within the MFC. Negative SMDs denote lower GABA concentrations in patients in comparison with controls and positive SMDs denote higher GABA concentrations in patients relative to controls. Abbreviations: SMD – standardized mean difference, CI – confidence interval, RE – Random effects, df – degrees of freedom.



### Medial Frontal Cortex in Bipolar Disorder

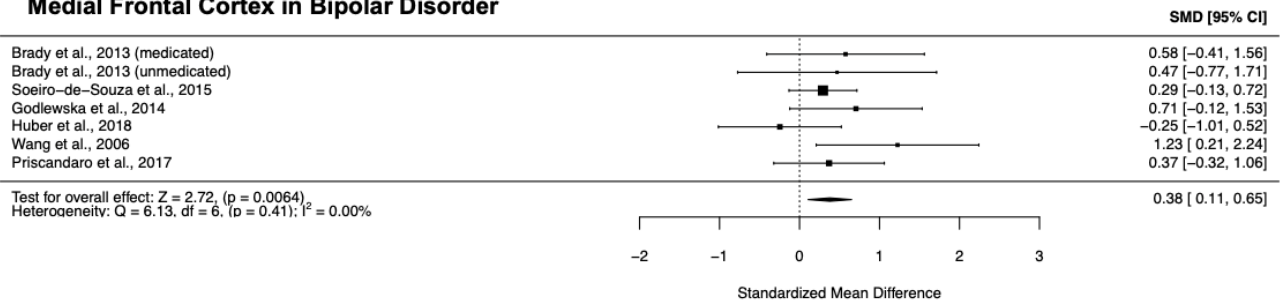

Supplementary Figure 3: Forest plots showing summary effect sizes between individuals with bipolar disorder and healthy controls for all voxels within the MFC. Negative SMDs denote lower GABA concentrations in patients in comparison with controls and positive SMDs denote higher GABA concentrations in patients relative to controls. Abbreviations: SMD – standardized mean difference, CI – confidence interval, df – degrees of freedom.

### Medial Frontal Cortex in UHR

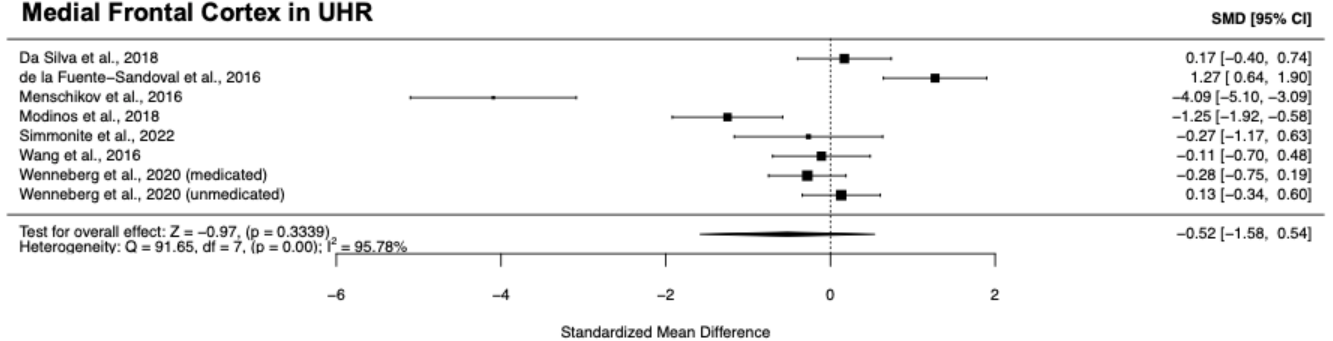

Supplementary Figure 4: Forest plots showing summary effect sizes between UHR individuals and healthy controls for all voxels within the MFC. Negative SMDs denote lower GABA concentrations in UHR individuals in comparison with controls and positive SMDs denote higher GABA concentrations in UHR individuals relative to controls. Abbreviations: SMD – standardized mean difference, CI – confidence interval, df – degrees of freedom.

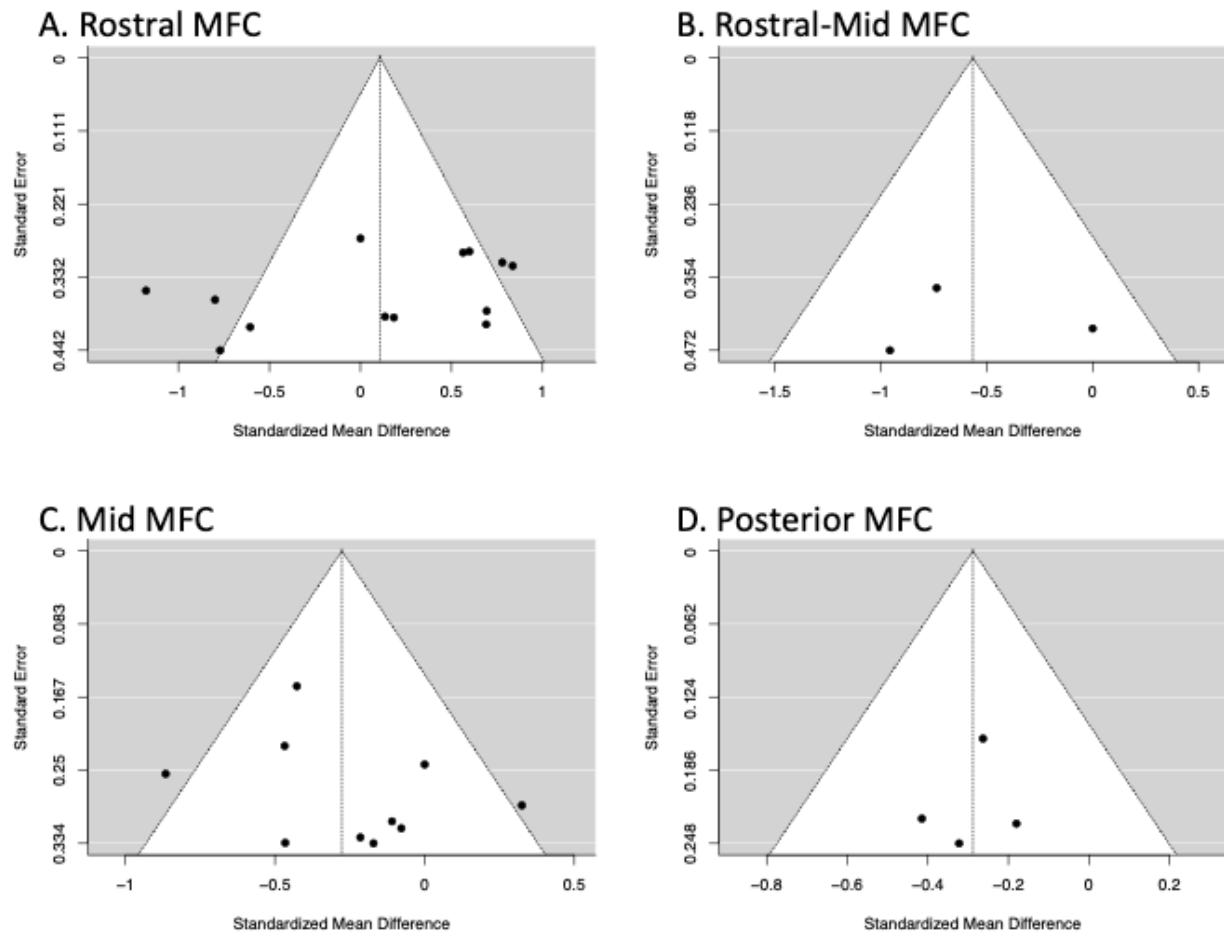

Supplementary Figure 5: Funnel plots for studies on Schizophrenia in the A) rostral MFC; B) rostral-mid MFC; C) mid MFC; and Posterior MFC showing the relationship between the standardized mean difference and standard error for each included study. Egger's test is not significant for the rostral MFC ( $p = .14$ ), rostral-mid MFC ( $p = .99$ ), mid MFC ( $p = .31$ ) or posterior MFC ( $p = .85$ ).

### A. Rostral MFC

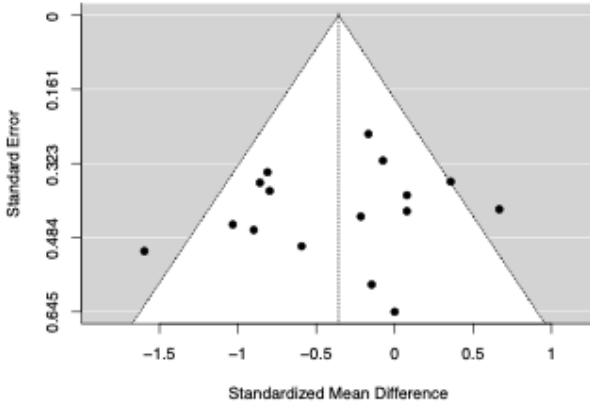

### B. Rostral-Mid MFC

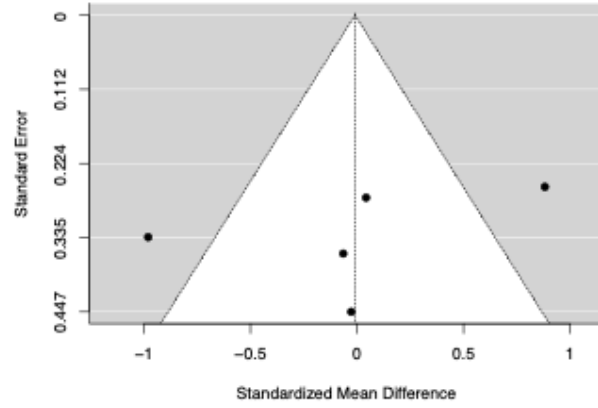

### C. Mid MFC

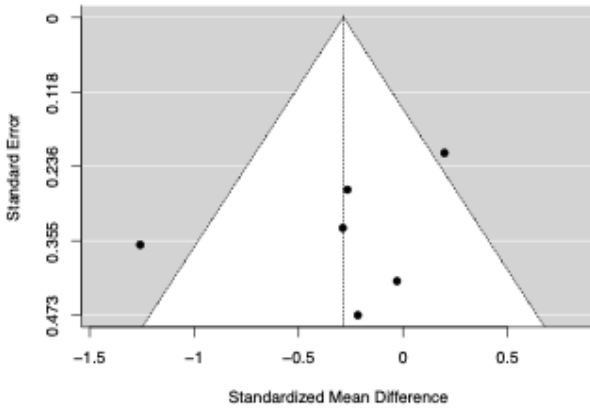

Supplementary Figure 6: Funnel plots for studies on depression in the A) rostral MFC; B) rostral-mid MFC; C) mid MFC, showing the relationship between the standardized mean difference and standard error for each included study. Egger's test is not significant for the rostral MFC ( $p = .55$ ), rostral-mid MFC ( $p = .44$ ) or mid MFC ( $p = .50$ )

### A. Rostral MFC in Bipolar Disorder

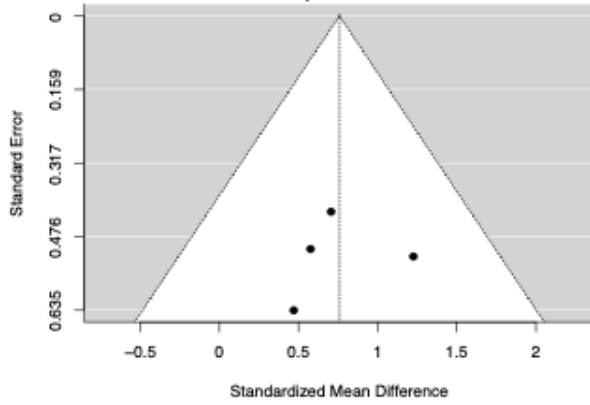

### B. Mid MFC in Bipolar Disorder

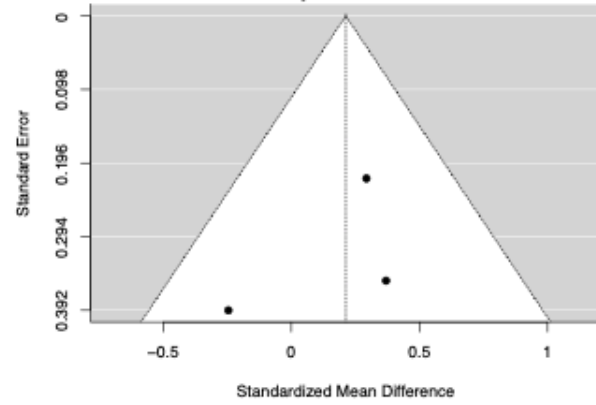

### C. Rostral MFC in UHR

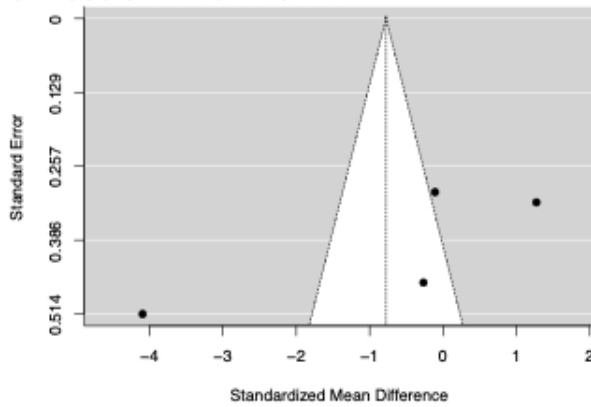

Supplementary Figure 7: Funnel plots for studies on bipolar disorder in the A) rostral MFC and B) mid MFC, and C, studies of individuals meeting ultra-high risk (UHR) criteria in the mid MFC, showing the relationship between the standardized mean difference and standard error for each included study. Egger's test is not significant for the rostral MFC ( $p = .50$ ) or mid MFC ( $p = .47$ ) in bipolar disorder, or the rostral MFC in UHR ( $p = .06$ )

## Supplementary References

1. Cen H, Xu J, Yang Z, Mei L, Chen T, Zhuo K, *et al.* (2020): Neurochemical and brain functional changes in the ventromedial prefrontal cortex of first-episode psychosis patients: A combined functional magnetic resonance imaging—proton magnetic resonance spectroscopy study. *Aust N Z J Psychiatry* 54: 519–527.
2. Chen T, Wang Y, Zhang J, Wang Z, Xu J, Li Y, *et al.* (2017): Abnormal Concentration of GABA and Glutamate in The Prefrontal Cortex in Schizophrenia.-An in Vivo 1H-MRS Study. *Shanghai Arch Psychiatry* 29: 277–286.
3. Chiu PW, Lui SSY, Hung KSY, Chan RCK, Chan Q, Sham PC, *et al.* (2018): In vivo gamma-aminobutyric acid and glutamate levels in people with first-episode schizophrenia: A proton magnetic resonance spectroscopy study. *Schizophr Res* 193: 295–303.
4. de la Fuente-Sandoval C, Reyes-Madrigal F, Mao X, León-Ortiz P, Rodríguez-Mayoral O, Jung-Cook H, *et al.* (2018): Prefrontal and Striatal Gamma-Aminobutyric Acid Levels and the Effect of Antipsychotic Treatment in First-Episode Psychosis Patients. *Biol Psychiatry* 83: 475–483.
5. Kegeles LS, Mao X, Stanford AD, Girgis R, Ojeil N, Xu X, *et al.* (2012): Elevated prefrontal cortex  $\gamma$ -aminobutyric acid and glutamate-glutamine levels in schizophrenia measured in vivo with proton magnetic resonance spectroscopy. *Arch Gen Psychiatry* 69: 449–459.
6. Ragland JD, Maddock RJ, Hurtado MY, Tanase C, Lesh TA, Niendam TA, *et al.* (2020): Disrupted GABAergic facilitation of working memory performance in people with schizophrenia. *NeuroImage Clin* 25. <https://doi.org/10.1016/j.nicl.2019.102127>
7. Simmonite M, Yao, B., Welsh, R, Taylor SF (2022): Increased rostral medial frontal GABA+ in early psychosis is obscured by levels of negative affect. medRxiv.
8. Wang JJ, Wang JJ, Tang Y, Zhang T, Cui H, Xu L, *et al.* (2016): Reduced  $\gamma$ -Aminobutyric Acid and Glutamate+Glutamine Levels in Drug-Naïve Patients with First-Episode Schizophrenia but Not in Those at Ultrahigh Risk. *Neural Plast.* <https://doi.org/10.1155/2016/3915703>
9. Xia M, Wang J, Sheng J, Tang Y, Li C, Lim K, *et al.* (2018): Effect of Electroconvulsive Therapy on Medial Prefrontal  $\gamma$ -Aminobutyric Acid among Schizophrenia Patients: A Proton Magnetic Resonance Spectroscopy Study. *J ECT* 34: 227–232.
10. Yang Z, Zhu Y, Song Z, Mei L, Zhang J, Chen T, *et al.* (2015): Comparison of the density of gamma-aminobutyric acid in the ventromedial prefrontal cortex of patients with first-episode psychosis and healthy controls. *Shanghai Arch Psychiatry* 27: 341–347.
11. Marsman A, Mandl RCW, Klomp DWJ, Bohlken MM, Boer VO, Andreychenko A, *et al.* (2014): GABA and glutamate in schizophrenia: A 7 T 1H-MRS study. *NeuroImage Clin* 6: 398–407.
12. Rowland LM, Kontson K, West J, Edden RA, Zhu H, Wijtenburg SA, *et al.* (2013): In vivo measurements of glutamate, GABA, and NAAG in schizophrenia. *Schizophr Bull* 39: 1096–1104.
13. Bojesen KB, Broberg BV, Fagerlund B, Jessen K, Thomas MB, Sigvard A, *et al.* (2021): Associations Between Cognitive Function and Levels of Glutamatergic Metabolites and Gamma-Aminobutyric Acid in Antipsychotic-Naïve Patients With Schizophrenia or Psychosis. *Biol Psychiatry* 89: 278–287.
14. Brandt AS, Unschuld PG, Pradhan S, Lim IAL, Churchill G, Harris AD, *et al.* (2016): Age-related changes in anterior cingulate cortex glutamate in schizophrenia: A 1H MRS Study at 7 Tesla. *Schizophr Res* 172: 101–105.
15. Goto N, Yoshimura R, Moriya J, Kakeda S, Ueda N, Ikenouchi-Sugita A, *et al.* (2009): Reduction of brain  $\gamma$ -aminobutyric acid (GABA) concentrations in early-stage schizophrenia patients: 3T Proton MRS study. *Schizophr Res*, vol. 112. pp 192–193.
16. Öngür D, Prescott AP, McCarthy J, Cohen BM, Renshaw PF (2010): Elevated gamma-aminobutyric acid levels in chronic schizophrenia. *Biol Psychiatry* 68: 667–670.

17. Reid MA, Salibi N, White DM, Gawne TJ, Denney TS, Lahti AC (2019): 7T Proton Magnetic Resonance Spectroscopy of the Anterior Cingulate Cortex in First-Episode Schizophrenia. *Schizophr Bull* 45: 180–189.
18. Rowland LM, Krause BW, Wijtenburg SA, McMahon RP, Chiappelli J, Nugent KL, *et al.* (2016): Medial frontal GABA is lower in older schizophrenia: A MEGA-PRESS with macromolecule suppression study. *Mol Psychiatry* 21: 198–204.
19. Wang AM, Pradhan S, Coughlin JM, Trivedi A, Dubois SL, Crawford JL, *et al.* (2019): Assessing Brain Metabolism with 7-T Proton Magnetic Resonance Spectroscopy in Patients with First-Episode Psychosis. *JAMA Psychiatry* 76: 314–323.
20. Wijtenburg SA, Wang M, Korenic SA, Chen S, Barker PB, Rowland LM (2021): Metabolite Alterations in Adults With Schizophrenia, First Degree Relatives, and Healthy Controls: A Multi-Region 7T MRS Study. *Front Psychiatry* 12. <https://doi.org/10.3389/fpsy.2021.656459>
21. Hjelmervik H, Craven AR, Sinceviciute I, Johnsen E, Kompus K, Bless JJ, *et al.* (2020): Intra-Regional Glu-GABA vs Inter-Regional Glu-Glu Imbalance: A 1H-MRS Study of the Neurochemistry of Auditory Verbal Hallucinations in Schizophrenia. *Schizophr Bull* 46: 633–642.
22. Marenco S, Meyer C, Kuo S, Van Der Veen JW, Shen J, DeJong K, *et al.* (2016): Prefrontal GABA levels measured with magnetic resonance spectroscopy in patients with psychosis and unaffected siblings. *Am J Psychiatry*, vol. 173 173: 527–534.
23. Tayoshi S, Nakataki M, Sumitani S, Taniguchi K, Shibuya-Tayoshi S, Numata S, *et al.* (2010): GABA concentration in schizophrenia patients and the effects of antipsychotic medication: A proton magnetic resonance spectroscopy study. *Schizophr Res* 117: 83–91.
24. Brennan BP, Admon R, Perriello C, LaFlamme EM, Athey AJ, Pizzagalli DA, *et al.* (2017): Acute change in anterior cingulate cortex GABA, but not glutamine/glutamate, mediates antidepressant response to citalopram. *Psychiatry Res - Neuroimaging* 269: 9–16.
25. Gabbay V, Mao X, Klein RG, Ely BA, Babb JS, Panzer AM, *et al.* (2012): Anterior cingulate cortex  $\gamma$ -aminobutyric acid in depressed adolescents: Relationship to anhedonia. *Arch Gen Psychiatry* 69: 139–149.
26. Gabbay V, Bradley KA, Mao X, Ostrover R, Kang G, Shungu DC (2017): Anterior cingulate cortex  $\gamma$ -aminobutyric acid deficits in youth with depression. *Transl Psychiatry* 7: e1216.
27. Hasler G, Neumeister A, Van Der Veen JW, Tumonis T, Bain EE, Shen J, *et al.* (2005): Normal prefrontal gamma-aminobutyric acid levels in remitted depressed subjects determined by proton magnetic resonance spectroscopy. *Biol Psychiatry* 58: 969–973.
28. Hasler G, Van Der Veen JW, Tumonis T, Meyers N, Shen J, Drevets WC (2007): Reduced prefrontal glutamate/glutamine and  $\gamma$ -aminobutyric acid levels in major depression determined using proton magnetic resonance spectroscopy. *Arch Gen Psychiatry* 64: 193–200.
29. Ironside M, Moser AD, Holsen LM, Zuo CS, Du F, Perlo S, *et al.* (2021): Reductions in rostral anterior cingulate GABA are associated with stress circuitry in females with major depression: a multimodal imaging investigation. *Neuropsychopharmacology* 46: 2188–2196.
30. Kantrowitz JT, Dong Z, Milak MS, Rashid R, Kegeles LS, Javitt DC, *et al.* (2021): Ventromedial prefrontal cortex/anterior cingulate cortex Glx, glutamate, and GABA levels in medication-free major depressive disorder. *Transl Psychiatry* 11. <https://doi.org/10.1038/s41398-021-01541-1>
31. Price RB, Shungu DC, Mao X, Nestadt P, Kelly C, Collins KA, *et al.* (2009): Amino Acid Neurotransmitters Assessed by Proton Magnetic Resonance Spectroscopy: Relationship to Treatment Resistance in Major Depressive Disorder. *Biol Psychiatry* 65: 792–800.
32. Walter M, Henning A, Grimm S, Schulte RF, Beck J, Dydak U, *et al.* (2009): The relationship between aberrant neuronal activation in the pregenual anterior cingulate, altered

- glutamatergic metabolism, and anhedonia in major depression. *Arch Gen Psychiatry* 66: 478–486.
33. Wang D, Wang X, Luo MT, Li YH, Wang H (2019): Gamma-aminobutyric acid levels in the anterior cingulate cortex of perimenopausal women with depression: A magnetic resonance spectroscopy study. *Front Neurosci* 13. <https://doi.org/10.3389/fnins.2019.00785>
  34. Zhang X, Tang Y, Maletic-Savatic M, Sheng J, Zhang X, Zhu Y, *et al.* (2016): Altered neuronal spontaneous activity correlates with glutamate concentration in medial prefrontal cortex of major depressed females: An fMRI-MRS study. *J Affect Disord* 201: 153–161.
  35. Deligiannidis KM, Fales CL, Kroll-Desrosiers AR, Shaffer SA, Villamarin V, Tan Y, *et al.* (2019): Resting-state functional connectivity, cortical GABA, and neuroactive steroids in peripartum and peripartum depressed women: a functional magnetic resonance imaging and spectroscopy study. *Neuropsychopharmacology* 44: 546–554.
  36. Draganov M, Vives-Gilabert Y, de Diego-Adeliño J, Vicent-Gil M, Puigdemont D, Portella MJ (2020): Glutamatergic and GABA-ergic abnormalities in First-episode depression. A 1-year follow-up 1H-MR spectroscopic study. *J Affect Disord* 266: 572–577.
  37. Knudsen MK, Near J, Blicher AB, Videbech P, Blicher JU (2019): Magnetic resonance (MR) spectroscopic measurement of  $\gamma$ -aminobutyric acid (GABA) in major depression before and after electroconvulsive therapy. *Acta Neuropsychiatr* 31: 17–26.
  38. Baeken C, Lefaucheur JP, Van Schuerbeek P (2017): The impact of accelerated high frequency rTMS on brain neurochemicals in treatment-resistant depression: Insights from 1H MR spectroscopy. *Clin Neurophysiol* 128: 1664–1672.
  39. Benson KL, Bottary R, Schoerning L, Baer L, Gonenc A, Eric Jensen J, Winkelman JW (2020): 1H MRS Measurement of Cortical GABA and Glutamate in Primary Insomnia and Major Depressive Disorder: Relationship to Sleep Quality and Depression Severity. *J Affect Disord* 274: 624–631.
  40. Bhagwagar Z, Wylezinska M, Jezzard P, Evans J, Boorman E, Matthews PM, Cowen PJ (2008): Low GABA concentrations in occipital cortex and anterior cingulate cortex in medication-free, recovered depressed patients. *Int J Neuropsychopharmacol* 11: 255–260.
  41. Persson J, Wall A, Weis J, Gingnell M, Antoni G, Lubberink M, Bodén R (2021): Inhibitory and excitatory neurotransmitter systems in depressed and healthy: A positron emission tomography and magnetic resonance spectroscopy study. *Psychiatry Res - Neuroimaging* 315. <https://doi.org/10.1016/j.pscychresns.2021.111327>
  42. Smith GS, Oeltzschner G, Gould NF, Leoutsakos JMS, Nassery N, Joo JH, *et al.* (2021): Neurotransmitters and Neurometabolites in Late-Life Depression: A Preliminary Magnetic Resonance Spectroscopy Study at 7T. *J Affect Disord* 279: 417–425.
  43. Wang Z, Zhang A, Zhao B, Gan J, Wang G, Gao F, *et al.* (2016): GABA+ levels in postmenopausal women with mild-to-moderate depression A preliminary study. *Med (United States)* 95. <https://doi.org/10.1097/MD.0000000000004918>
  44. Brady RO, Mccarthy JM, Prescott AP, Jensen JE, Cooper AJ, Cohen BM, *et al.* (2013): Brain gamma-aminobutyric acid (GABA) abnormalities in bipolar disorder. *Bipolar Disord* 15: 434–439.
  45. Godlewska BR, Yip SW, Near J, Goodwin GM, Cowen PJ (2014): Cortical glutathione levels in young people with bipolar disorder: A pilot study using magnetic resonance spectroscopy. *Psychopharmacology (Berl)* 231: 327–332.
  46. Wang PW, Sailasuta N, Chandler RA, Ketter TA (2006): Magnetic resonance spectroscopic measurement of cerebral gamma-aminobutyric acid concentrations in patients with bipolar disorders. *Acta Neuropsychiatr* 18: 120–126.
  47. Huber RS, Kondo DG, Shi XF, Prescott AP, Clark E, Renshaw PF, Yurgelun-Todd DA (2018): Relationship of executive functioning deficits to N-acetyl aspartate (NAA) and gamma-aminobutyric acid (GABA) in youth with bipolar disorder. *J Affect Disord* 225: 71–

78.

48. Prisciandaro JJ, Tolliver BK, Prescott AP, Brenner HM, Renshaw PF, Brown TR, Anton RF (2017): Unique prefrontal GABA and glutamate disturbances in co-occurring bipolar disorder and alcohol dependence. *Transl Psychiatry* 7. <https://doi.org/10.1038/tp.2017.141>
49. Soeiro-de-Souza MG, Henning A, Machado-Vieira R, Moreno RA, Pastorello BF, da Costa Leite C, *et al.* (2015): Anterior cingulate Glutamate-Glutamine cycle metabolites are altered in euthymic bipolar I disorder. *Eur Neuropsychopharmacol* 25: 2221–2229.
50. De La Fuente-Sandoval C, Reyes-Madriral F, Mao X, León-Ortiz P, Rodríguez-Mayoral O, Solís-Vivanco R, *et al.* (2015): Cortico-striatal GABAergic and glutamatergic dysregulations in subjects at ultra-high risk for psychosis investigated with proton magnetic resonance spectroscopy. *Int J Neuropsychopharmacol* 19: 1–10.
51. Menschikov PE, Semenova NA, Ublinskiy M V., Akhadov TA, Keshishyan RA, Lebedeva IS, *et al.* (2016): 1H-MRS and MEGA-PRESS pulse sequence in the study of balance of inhibitory and excitatory neurotransmitters in the human brain of ultra-high risk of schizophrenia patients. *Dokl Biochem Biophys* 468: 168–172.
52. Wenneberg C, Nordentoft M, Rostrup E, Glenthøj LB, Bojesen KB, Fagerlund B, *et al.* (2020): Cerebral Glutamate and Gamma-Aminobutyric Acid Levels in Individuals at Ultra-high Risk for Psychosis and the Association With Clinical Symptoms and Cognition. *Biol Psychiatry Cogn Neurosci Neuroimaging* 5: 569–579.
53. Da Silva T, Hafizi S, Rusjan PM, Houle S, Wilson AA, Prce I, *et al.* (2019): GABA levels and TSPO expression in people at clinical high risk for psychosis and healthy volunteers: A PET-MRS study. *J Psychiatry Neurosci* 44: 111–119.
54. Modinos G, Şimşek F, Azis M, Bossong M, Bonoldi I, Samson C, *et al.* (2018): Prefrontal GABA levels, hippocampal resting perfusion and the risk of psychosis. *Neuropsychopharmacology* 43: 2652–2659.
